# Supplementary material for: RedRibbon: A new rank–rank hypergeometric overlap for gene and transcript expression signatures
Source: PubMed Central journal article supplement (PMC10709657; doi:10.26508/lsa.202302203), 2023-12-08
Supplement: LSA-2023-02203_review_history.pdf [file LSA-2023-02203_review_history.pdf]

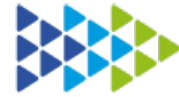

Life Science Alliance

# RedRibbon: A new rank-rank hypergeometric overlap for gene and transcript expression signatures

Anthony Piron, Florian Szymczak, Theodora Papadopoulou, Maria Alvelos, Matthieu Defrance, Tom Lenaerts, Decio Eizirik, and Miriam Cnop

DOI: <https://doi.org/10.26508/lsa.202302203>

Corresponding author(s): Anthony Piron, Université Libre de Bruxelles

---

## Review Timeline:

|                     |            |
|---------------------|------------|
| Submission Date:    | 2023-06-07 |
| Editorial Decision: | 2023-08-08 |
| Revision Received:  | 2023-11-01 |
| Editorial Decision: | 2023-11-17 |
| Revision Received:  | 2023-11-28 |
| Accepted:           | 2023-11-29 |

---

Scientific Editor: Eric Sawey, PhD

## Transaction Report:

(Note: With the exception of the correction of typographical or spelling errors that could be a source of ambiguity, letters and reports are not edited. The original formatting of letters and referee reports may not be reflected in this compilation.)

August 8, 2023

Re: Life Science Alliance manuscript #LSA-2023-02203-T

ANTHONY PIRON

Dear Dr. Piron,

Thank you for submitting your manuscript entitled "RedRibbon: A new rank-rank hypergeometric overlap pipeline to compare gene and transcript expression signatures" to Life Science Alliance. The manuscript was assessed by an expert reviewer, whose comments are appended to this letter. We invite you to submit a revised manuscript addressing the Reviewer comments.

To upload the revised version of your manuscript, please log in to your account: <https://lsa.msubmit.net/cgi-bin/main.plex>

You will be guided to complete the submission of your revised manuscript and to fill in all necessary information. Please get in touch in case you do not know or remember your login name.

While you are revising your manuscript, please also attend to the below editorial points to help expedite the publication of your manuscript. Please direct any editorial questions to the journal office.

The typical timeframe for revisions is three months. Please note that papers are generally considered through only one revision cycle, so strong support from the referees on the revised version is needed for acceptance.

When submitting the revision, please include a letter addressing the reviewer comments point by point.

We hope that the comments below will prove constructive as your work progresses.

Thank you for this interesting contribution to Life Science Alliance. We are looking forward to receiving your revised manuscript.

Sincerely,

Eric Sawey, PhD  
Executive Editor  
Life Science Alliance  
<http://www.lsjournal.org>

-----  
**A. THESE ITEMS ARE REQUIRED FOR REVISIONS**

-- A letter addressing the reviewers' comments point by point.

-- An editable version of the final text (.DOC or .DOCX) is needed for copyediting (no PDFs).

-- High-resolution figure, supplementary figure and video files uploaded as individual files: See our detailed guidelines for preparing your production-ready images, <https://www.life-science-alliance.org/authors>

-- Summary blurb (enter in submission system): A short text summarizing in a single sentence the study (max. 200 characters including spaces). This text is used in conjunction with the titles of papers, hence should be informative and complementary to the title and running title. It should describe the context and significance of the findings for a general readership; it should be written in the present tense and refer to the work in the third person. Author names should not be mentioned.

-- By submitting a revision, you attest that you are aware of our payment policies found here: <https://www.life-science-alliance.org/copyright-license-fee>

**B. MANUSCRIPT ORGANIZATION AND FORMATTING:**

Full guidelines are available on our Instructions for Authors page, <https://www.life-science-alliance.org/authors>

We encourage our authors to provide original source data, particularly uncropped/-processed electrophoretic blots and spreadsheets for the main figures of the manuscript. If you would like to add source data, we would welcome one PDF/Excel-file

per figure for this information. These files will be linked online as supplementary "Source Data" files.

\*\*\*IMPORTANT: It is Life Science Alliance policy that if requested, original data images must be made available. Failure to provide original images upon request will result in unavoidable delays in publication. Please ensure that you have access to all original microscopy and blot data images before submitting your revision.\*\*\*

-----  
Reviewer #1 (Comments to the Authors (Required)):

The authors present the RedRibbon software that was developed to overcome some of the shortcomings that remain for the original RRHO (Rank-Rank Hypergeometric Overlap) approach developed for microarray data (by Plaisier et al. 2010, NAR) which compares 2 lists of differentially expressed genes.

The advance the authors present avoids some of the numerical and performance issues associated with the original RRHO approach (underflow issues, slow run time on large datasets,...) with performance was evaluated on both synthetic and experimental datasets.

The results presented support the claims made in the manuscript.

Areas to improve:

Please check statement at the top of page 4 beginning "Despite the progress..." and clarify what is meant, as there are plenty of methods for differential transcript analysis (any gene-level method will work on transcript counts).

Regarding directional testing, the method of Wu et al. (2010) (Bioinformatics, 26(17):2176-82, <https://pubmed.ncbi.nlm.nih.gov/20610611/>) allows directional testing between 2 sets and can be applied to either microarray data (as per the original publication) or RNA-seq (as implemented in the limma software (roast), along with a faster implementation (fry)). It would be good to position the work presented in relation to this and other similar approaches.

It was unclear how the transcript-level results are linked to external signature databases in Figure 4c and Figure 5 (as the authors point out in the Introduction, current pathway databases are gene-centric, so it would be good to explain how transcripts are mapped to genes in these analyses somewhere in the manuscript).

The RedRibbon user guide was quite brief, and I wondered if it would benefit from further examples of application of the software? Has it been applied to further datasets? Are there any long-read RNA-seq datasets which could be analysed by this method (they may allow more accurate quantification of transcript-level expression changes than short-read RNA-seq)?

There is very little detail on the data structures in the methods, a topic which is repeatedly mentioned in the article as something that has been improved in this work. Perhaps this can be either toned down throughout if it is only a minor thing, or the methods can be expanded with a figure added to explain this important enhancement in more detail.

Check expression p19 'RedRibbon allows to do a full...' (missing word/s?)

Check for consistency throughout: P-value (italicised versus non-italicised P)

Missing spaces - page 23: 4.4.1 Hybrid prediction-permutation methodRedRibbon

- page 24: 4.4.3 Computing the parameters of linear regressions and selecting HPP predictorsIn

- Please provide the full link to the code (the zenodo number given isn't given) <https://zenodo.org/record/7636157>

Reviewer #1 comments:

*The authors present the RedRibbon software that was developed to overcome some of the shortcomings that remain for the original RRHO (Rank-Rank Hypergeometric Overlap) approach developed for microarray data (by Plaisier et al. 2010, NAR) which compares 2 lists of differentially expressed genes.*

*The advance the authors present avoids some of the numerical and performance issues associated with the original RRHO approach (underflow issues, slow run time on large datasets,...) with performance was evaluated on both synthetic and experimental datasets.*

*The results presented support the claims made in the manuscript.*

We thank the Reviewer for the careful review of our paper and the positive and constructive feedback.

*Areas to improve:*

*Please check the statement at the top of page 4 beginning "Despite the progress..." and clarify what is meant, as there are plenty of methods for differential transcript analysis (any gene-level method will work on transcript counts).*

Thank you for this valid comment. We have now clarified in the introduction that several differential transcript analysis tools exist. No tools were available, however, to compare two distinct differential transcript analyses.

*Regarding directional testing, the method of Wu et al. (2010) (Bioinformatics, 26(17):2176-82, <https://pubmed.ncbi.nlm.nih.gov/20610611/>) allows directional testing between 2 sets and can be applied to either microarray data (as per the original publication) or RNA-seq (as implemented in the limma software (roast), along with a faster implementation (fry)). It would be good to position the work presented in relation to this and other similar approaches.*

Thank you for your suggestion to position our work in relation to ROAST. ROAST is an interesting, focused gene set enrichment method with an original  $P$ -value correction method using rotations to account for gene correlation. This method is, to our understanding, not comparable to RedRibbon nor transposable to two differential analyses. Instead, it compares one differential analysis against a focused gene set.

The differential studies under examination may not be expressible as a linear model. RedRibbon has a generic setup requiring a statistic that can be ranked, such as fold-changes or  $P$ -values (the model to generate them can even be unknown).

The ROAST statistics expect for the comparison a gene set and not a full differential analysis including non-significant genes. To this end, one differential analysis can be converted to a gene list using a significance threshold (e.g.,  $P$ -adjusted  $\leq 0.05$ ). It hence does not have the threshold-freeness of RRHO.

We have now included in the Introduction (page 3) the focused gene set testing by ROAST, to position RedRibbon as a threshold-free method to compare two differential analyses.

*It was unclear how the transcript-level results are linked to external signature databases in Figure 4c and Figure 5 (as the authors point out in the Introduction, current pathway databases are gene-centric, so it would be good to explain how transcripts are mapped to genes in these analyses somewhere in the manuscript).*

We thank the Reviewer for this valid comment. RedRibbon generates transcript lists for each regulation quadrant when applied to two differential transcript expression analyses. To perform pathway analyses, we replaced the transcript identifiers with their corresponding gene identifiers using GENCODE annotation (GRch38 version 37). Multiple transcripts in the same quadrant or in different quadrants may be mapped to the same gene. The loss of this multiplicity information is inherent to using gene-centric pathway databases and will be solved when transcript-level pathway databases become available. We have included the information on how transcripts were mapped to genes (and the loss of information that comes with it) in the Results section describing Figure 4c and Figure 5.

*The RedRibbon user guide was quite brief, and I wondered if it would benefit from further examples of application of the software? Has it been applied to further datasets? Are there any long-read RNA-seq datasets which could be analysed by this method (they may allow more accurate quantification of transcript-level expression changes than short-read RNA-seq)?*

Following the Reviewer's excellent suggestion, we did a major overhaul of the user guide. We enhanced and clarified the synthetic data set introduction with more context and a description of each parameter used. We also included in the user guide more diverse omics datasets. First, we obtained long-read RNA-seq data of cytokine-exposed EndoC- $\beta$ H1 cells and compared these against our short-read RNA-seq. This interesting comparison identified a strong signal in the up-upregulation quadrant, consistent with a nearly perfect overlap. This new analysis has also been included in the main text (page 10) and as a new Figure 6. Second, we used RedRibbon to compare proteomic and transcriptomic datasets, further illustrating the flexibility and robustness of the tool in terms of dataset comparisons. This comparison has been included in the supplemental R vignette.

*There is very little detail on the data structures in the methods, a topic which is repeatedly mentioned in the article as something that has been improved in this work. Perhaps this can be either toned down throughout if it is only a minor thing, or the methods can be expanded with a figure added to explain this important enhancement in more detail.*

We thank the Reviewer for this valid comment. A new panel D has been added to Figure 7 to illustrate the bitset data structure and the optimization of the intersection algorithm described in section 4.5. The Figure legend and the Methods section have been adapted accordingly. This new panel D in Figure 7 illustrates the bit level parallelism and the use of previously computed intersection. These two points are central to achieve the required performance for transcript analyses.

*Check expression p19 'RedRibbon allows to do a full...' (missing word/s?)*

We corrected the wording of the sentence as "RedRibbon enables the execution of a comprehensive RRHO analysis including the computation of adjusted *P*-values using gene correlation. It can be applied to lists or differential analyses that consist of millions of elements."

*Check for consistency throughout: P-value (italicised versus non-italicised P)*

We uniformized the *P*-value notation. The italicized P version "*P*-value" is now used for the whole manuscript. This notation is commonly used in Life Science Alliance publications.

*Missing spaces - page 23: 4.4.1 Hybrid prediction-permutation methodRedRibbon*

*- page 24: 4.4.3 Computing the parameters of linear regressions and selecting HPP predictorsIn*

We apologize for this; in the conversion of MS Word to PDF some spaces disappeared. This has been corrected.

- *Please provide the full link to the code (the zenodo number given isn't given)*  
<https://zenodo.org/record/7636157>

The full link is now provided in "5. data access" section (<https://zenodo.org/records/7585784>).

November 17, 2023

RE: Life Science Alliance Manuscript #LSA-2023-02203-TR

Dr. Anthony Piron  
Université Libre de Bruxelles  
ULB Center for Diabetes Research  
Route de Lennik 808 (U.L.B. CP618)  
Brussels (Anderlecht) 1070  
Belgium

Dear Dr. Piron,

Thank you for submitting your revised manuscript entitled "RedRibbon: A new rank-rank hypergeometric overlap for gene and transcript expression signatures". We would be happy to publish your paper in Life Science Alliance pending final revisions necessary to meet our formatting guidelines.

Along with points mentioned below, please tend to the following:

- please address the Reviewer's remaining minor comment
- please upload a clean manuscript without tracking changes
- please note that titles in the system and on the manuscript file must match
- please make sure the manuscript sections are aligned with LSA's formatting guidelines: please separate the Figure Legends and Supplemental Figure Legends into separate sections
- Regarding the Supplementary file, "Vignette S1": this additional information can remain as Supplementary Material (and should be referred to as Supplementary Material), but it should not have a unique set of authors, and should not have its own Abstract, as this is not a separate publication. Feel free to reach out via email if I am misunderstanding the intention of this section.

If you are planning a press release on your work, please inform us immediately to allow informing our production team and scheduling a release date.

LSA now encourages authors to provide a 30-60 second video where the study is briefly explained. We will use these videos on social media to promote the published paper and the presenting author (for examples, see <https://twitter.com/LSAjournal/timelines/1437405065917124608>). Corresponding or first-authors are welcome to submit the video. Please submit only one video per manuscript. The video can be emailed to [contact@life-science-alliance.org](mailto:contact@life-science-alliance.org)

To upload the final version of your manuscript, please log in to your account: <https://lsa.msubmit.net/cgi-bin/main.plex>  
You will be guided to complete the submission of your revised manuscript and to fill in all necessary information. Please get in touch in case you do not know or remember your login name.

To avoid unnecessary delays in the acceptance and publication of your paper, please read the following information carefully.

#### A. FINAL FILES:

These items are required for acceptance.

-- An editable version of the final text (.DOC or .DOCX) is needed for copyediting (no PDFs).

-- High-resolution figure, supplementary figure and video files uploaded as individual files: See our detailed guidelines for preparing your production-ready images, <https://www.life-science-alliance.org/authors>

-- Summary blurb (enter in submission system): A short text summarizing in a single sentence the study (max. 200 characters including spaces). This text is used in conjunction with the titles of papers, hence should be informative and complementary to the title. It should describe the context and significance of the findings for a general readership; it should be written in the present tense and refer to the work in the third person. Author names should not be mentioned.

#### B. MANUSCRIPT ORGANIZATION AND FORMATTING:

Full guidelines are available on our Instructions for Authors page, <https://www.life-science-alliance.org/authors>

We encourage our authors to provide original source data, particularly uncropped/-processed electrophoretic blots and spreadsheets for the main figures of the manuscript. If you would like to add source data, we would welcome one PDF/Excel-file

per figure for this information. These files will be linked online as supplementary "Source Data" files.

**\*\*Submission of a paper that does not conform to Life Science Alliance guidelines will delay the acceptance of your manuscript.\*\***

**\*\*It is Life Science Alliance policy that if requested, original data images must be made available to the editors. Failure to provide original images upon request will result in unavoidable delays in publication. Please ensure that you have access to all original data images prior to final submission.\*\***

**\*\*The license to publish form must be signed before your manuscript can be sent to production. A link to the electronic license to publish form will be available to the corresponding author only. Please take a moment to check your funder requirements.\*\***

**\*\*Reviews, decision letters, and point-by-point responses associated with peer-review at Life Science Alliance will be published online, alongside the manuscript. If you do want to opt out of having the reviewer reports and your point-by-point responses displayed, please let us know immediately.\*\***

Thank you for your attention to these final processing requirements. Please revise and format the manuscript and upload materials within 7 days.

Thank you for this interesting contribution, we look forward to publishing your paper in Life Science Alliance.

Sincerely,

Eric Sawey, PhD  
Executive Editor  
Life Science Alliance  
<http://www.lsajournal.org>

-----  
Reviewer #1 (Comments to the Authors (Required)):

The authors have carefully addressed the questions raised during review.

Minor:

Check the expression in the sentence beginning on line 90. It might read better as "Multiple differential analysis tools can be applied to transcript-level data (..."



November 29, 2023

RE: Life Science Alliance Manuscript #LSA-2023-02203-TRR

Dr. Anthony Piron  
Université Libre de Bruxelles  
ULB Center for Diabetes Research  
Route de Lennik 808 (U.L.B. CP618)  
Brussels (Anderlecht) 1070  
Belgium

Dear Dr. Piron,

Thank you for submitting your Methods entitled "RedRibbon: A new rank-rank hypergeometric overlap for gene and transcript expression signatures". It is a pleasure to let you know that your manuscript is now accepted for publication in Life Science Alliance. Congratulations on this interesting work.

The final published version of your manuscript will be deposited by us to PubMed Central upon online publication.

Your manuscript will now progress through copyediting and proofing. It is journal policy that authors provide original data upon request.

Reviews, decision letters, and point-by-point responses associated with peer-review at Life Science Alliance will be published online, alongside the manuscript. If you do want to opt out of having the reviewer reports and your point-by-point responses displayed, please let us know immediately.

**\*\*\*IMPORTANT:** If you will be unreachable at any time, please provide us with the email address of an alternate author. Failure to respond to routine queries may lead to unavoidable delays in publication.\*\*\*

Scheduling details will be available from our production department. You will receive proofs shortly before the publication date. Only essential corrections can be made at the proof stage so if there are any minor final changes you wish to make to the manuscript, please let the journal office know now.

**DISTRIBUTION OF MATERIALS:**

Authors are required to distribute freely any materials used in experiments published in Life Science Alliance. Authors are encouraged to deposit materials used in their studies to the appropriate repositories for distribution to researchers.

You can contact the journal office with any questions, [contact@life-science-alliance.org](mailto:contact@life-science-alliance.org)

Again, congratulations on a very nice paper. I hope you found the review process to be constructive and are pleased with how the manuscript was handled editorially. We look forward to future exciting submissions from your lab.

Sincerely,

Eric Sawey, PhD  
Executive Editor  
Life Science Alliance  
<http://www.lsajournal.org>
